# Supplementary material for: An epigenetic map of malaria parasite development from host to vector
Source: PubMed Central journal article supplement (PMC7156373; doi:10.1038/s41598-020-63121-5), 2020-04-14
Supplement: 41598_2020_63121_MOESM7_ESM.pdf [file 41598_2020_63121_MOESM7_ESM.pdf]

A

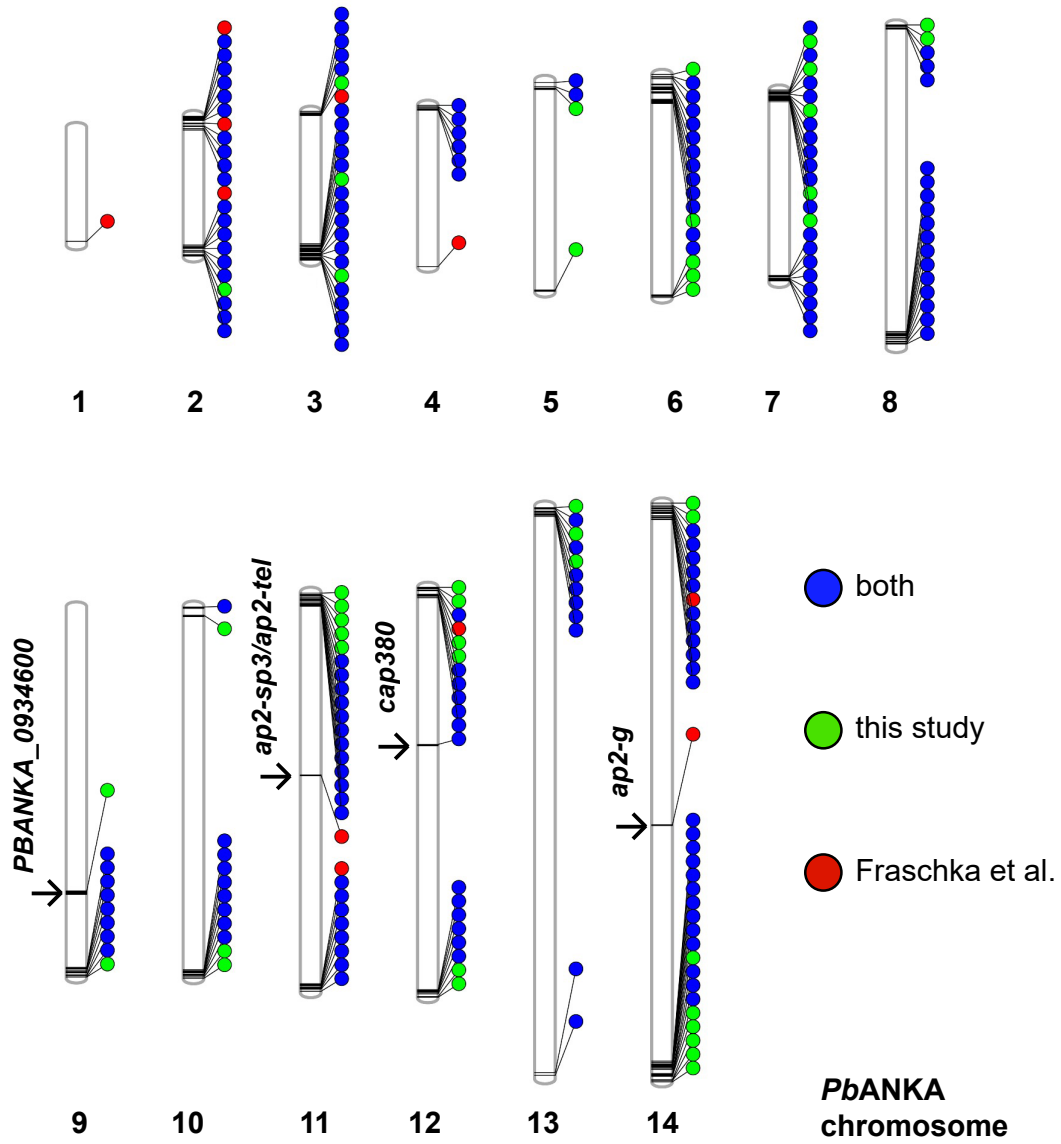

B

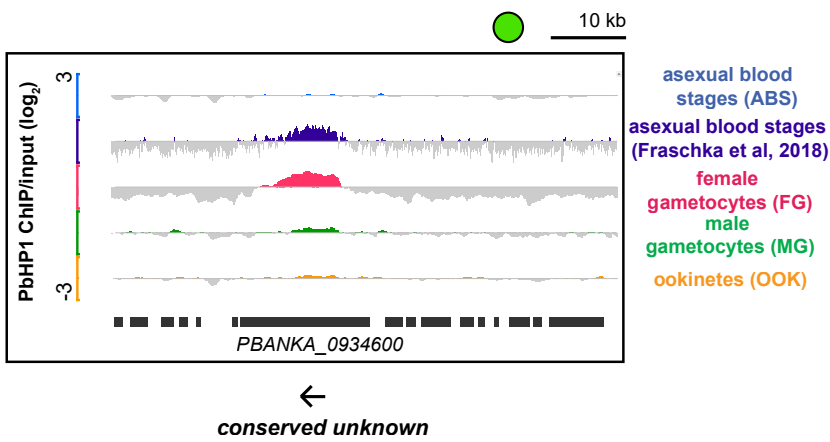

C

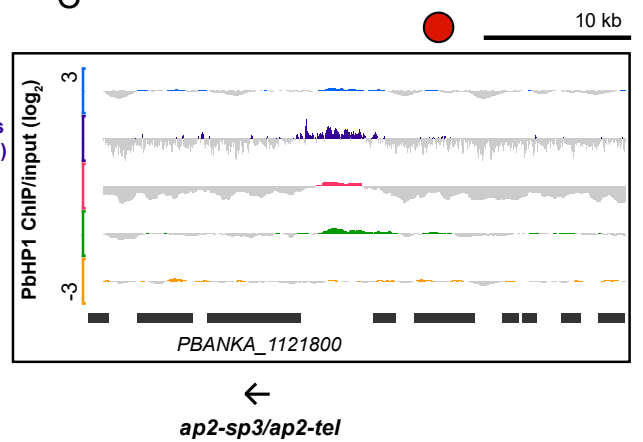

Figure S6
